# Supplementary material for: Age-related alterations in fertilization-induced Ca2+ oscillations depend on the genetic background of mouse oocytes
Source: PubMed Central journal article supplement — Biol Reprod. 2020 Aug 6;103(5):986–99. doi: 10.1093/biolre/ioaa139 (PMC7609943; doi:10.1093/biolre/ioaa139), 2020-08-06

## SUPPLEMENTARY MATERIAL

### **Age-related alterations in fertilization-induced Ca<sup>2+</sup> oscillations depend on the genetic background of mouse oocytes**

by

Katarzyna Czajkowska<sup>1</sup>, Agnieszka Walewska<sup>1,3</sup>, Takao Ishikawa<sup>2</sup>, Katarzyna Szczepańska<sup>1</sup>  
and Anna Ajduk<sup>1,\*</sup>

<sup>1</sup>Department of Embryology, Faculty of Biology, University of Warsaw, Warsaw, Poland

<sup>2</sup>Department of Molecular Biology, Faculty of Biology, University of Warsaw, Warsaw, Poland

<sup>3</sup>current address: Laboratory of Intracellular Ion Channels, Nencki Institute of Experimental Biology, Polish Academy of Sciences, Warsaw, Poland

\* corresponding author; email: [aajduk@biol.uw.edu.pl](mailto:aajduk@biol.uw.edu.pl)

## **Supplemental Figure legends**

### **Supplemental Figure S1**

#### **Characteristics of the Oregon Green 488 BAPTA 1-AM staining**

(A) Initial fluorescence intensity of the Oregon Green 488 BAPTA staining recorded for oocytes from young (black squares) and old (white squares) F1, SWISS, and C57BL/6 females. Each small square reflects a mean fluorescence intensity calculated for a single experiment (either in vitro fertilization or TG/A23187 treatment). Big squares reflect average intensities for all experiments conducted for a given type of oocytes. Error bars indicate standard deviations. (B) Representative image sequences showing Oregon Green 488 BAPTA fluorescence in oocytes from young and old F1, SWISS, and C57BL/6 females at the beginning of the recording and just before and during the 1<sup>st</sup> and the 3<sup>rd</sup> Ca<sup>2+</sup> transients. Time is measured from the beginning of the recording and is shown in minutes and seconds. There is no visible compartmentalization of the dye. Scale bar 10 μm.

### **Supplemental Figure S2**

#### **Representative patterns of Ca<sup>2+</sup> oscillations in fertilized oocytes from young and old F1, SWISS and C57BL/6 mice**

(A-B) The representative patterns of Ca<sup>2+</sup> oscillations in fertilized oocytes obtained from (A) young and (B) old F1 females. (C-D) The representative patterns of Ca<sup>2+</sup> oscillations in fertilized oocytes obtained from (C) young and (D) old SWISS females. (E-F) The representative patterns of Ca<sup>2+</sup> oscillations in fertilized oocytes obtained from (E) young and (F) old C57BL/6 females.

### **Supplemental Figure S3**

#### **Characteristics of the 3<sup>rd</sup> Ca<sup>2+</sup> transient in fertilized oocytes from young and old F1, SWISS and C57BL/6 mice**

(A) Duration and (B) amplitude of the 3<sup>rd</sup> Ca<sup>2+</sup> transient in young (n = 56 F1, 92 SWISS, 36 C57BL/6) and old (n = 29 F1, 73 SWISS, 16 C57BL/6) oocytes. (C) Rate of Ca<sup>2+</sup> increase during the 3<sup>rd</sup> Ca<sup>2+</sup> transient in young (n = 56 F1, 92 SWISS, 36 C57BL/6) and old (n = 29 F1, 74 SWISS, 16 C57BL/6) oocytes. (D) Rate of Ca<sup>2+</sup> decrease during the 3<sup>rd</sup> Ca<sup>2+</sup> transient in young (n = 56 F1, 92 SWISS, 36 C57BL/6) and old (n = 29 F1, 74 SWISS, 16 C57BL/6) oocytes. (A-D) Graphs present medians and the 1<sup>st</sup> and the 3<sup>rd</sup> quartile values. The ends of the whiskers are set at 1.5\*IQR above the third quartile and 1.5\*IQR below the first quartile. Dots show the minimum and maximum values if they are outside the range (outliers).

### **Supplemental Figure S4**

#### **ITPR and ATP2A2 in oocytes from young and old F1 females**

(A) A representative immunoblot showing the amount of ITPR protein in oocytes from young and old F1 females. The dashed line shows the area presented in Fig. 3 F (upper panel). The contrast and brightness have not been adjusted. (B) Quantification of the ITPR immunostaining in young (n=49) and old (n=13) F1 oocytes. (C) Quantification of the ATP2A2 immunostaining in young (n=29) and old (n=28) F1 oocytes. All intensity values in (B-C) were normalized with the mean fluorescence intensity calculated for the control, young oocytes imaged with the same settings. Graphs present medians and the 1<sup>st</sup> and the 3<sup>rd</sup> quartile values. The ends of the whiskers are set at 1.5\*IQR above the third quartile and 1.5\*IQR below the first quartile. Dots show the minimum and maximum values if they are outside the range (outliers).

**Supplemental Table S1.** The pattern of Ca<sup>2+</sup> oscillations and time of pronuclei formation in fertilized oocytes obtained from young and old females of different genetic background

| Parameter                                                                      | Median (Q1; Q3)                        |                                                    |                                        |                                                    |                                        |                                                    |
|--------------------------------------------------------------------------------|----------------------------------------|----------------------------------------------------|----------------------------------------|----------------------------------------------------|----------------------------------------|----------------------------------------------------|
|                                                                                | Number of analyzed embryos             |                                                    |                                        |                                                    |                                        |                                                    |
|                                                                                | F1                                     |                                                    | SWISS                                  |                                                    | C57BL/6                                |                                                    |
|                                                                                | young<br>(3 exp)#                      | old<br>(8 exp)                                     | young<br>(4 exp)                       | old<br>(4 exp)                                     | young<br>(2 exp)                       | old<br>(2 exp)                                     |
| No. of Ca <sup>2+</sup> transients                                             | <b>10.0</b><br>(8.0; 11.0)<br>n=57     | <b>7.0<sup>a</sup></b><br>(7.0; 8.0)<br>n=30       | <b>9.0</b><br>(7.0; 12.0)<br>n=93      | <b>9.0</b><br>(7.0; 11.0)<br>n=74                  | <b>8.5</b><br>(8.0; 9.3)<br>n=36       | <b>7.0<sup>c</sup></b><br>(5.0; 8.0)<br>n=17       |
| Total duration of Ca <sup>2+</sup> oscillations (min)                          | <b>153.2</b><br>(130.8; 172.5)<br>n=57 | <b>162.7</b><br>(122.7; 176.3)<br>n=29             | <b>162.1</b><br>(142.7; 194.3)<br>n=92 | <b>152.4<sup>d</sup></b><br>(132.9; 177.6)<br>n=74 | <b>153.0</b><br>(133.3; 171.6)<br>n=36 | <b>111.8<sup>b</sup></b><br>(66.0; 143.0)<br>n=17  |
| Mean interval between Ca <sup>2+</sup> transients* (min)                       | <b>15.5</b><br>(13.3; 17.8)<br>n=57    | <b>21.9<sup>a</sup></b><br>(18.9; 23.4)<br>n=29    | <b>16.9</b><br>(13.7; 20.8)<br>n=92    | <b>17.8</b><br>(15.1; 20.6)<br>n=74                | <b>17.6</b><br>(15.2; 20.6)<br>n=36    | <b>15.3</b><br>(12.3; 19.7)<br>n=17                |
| Duration of the 1 <sup>st</sup> Ca <sup>2+</sup> transient (min)               | <b>2.3</b><br>(2.0; 2.4)<br>n=55       | <b>2.8<sup>a</sup></b><br>(2.5; 3.1)<br>n=27       | <b>3.2</b><br>(2.7; 3.7)<br>n=92       | <b>2.5<sup>a</sup></b><br>(2.0; 2.8)<br>n=73       | <b>2.2</b><br>(2.0; 2.5)<br>n=36       | <b>2.6<sup>c</sup></b><br>(2.2; 2.7)<br>n=18       |
| Amplitude of the 1 <sup>st</sup> Ca <sup>2+</sup> transient ( $\Delta F/F_0$ ) | <b>0.8</b><br>(0.6; 0.9)<br>n=55       | <b>0.9</b><br>(0.8; 1.0)<br>n=27                   | <b>0.8</b><br>(0.8; 0.9)<br>n=92       | <b>0.8</b><br>(0.8; 0.9)<br>n=73                   | <b>1.0</b><br>(1.0; 1.1)<br>n=36       | <b>1.0<sup>d</sup></b><br>(0.9; 1.0)<br>n=18       |
| Duration of the 3 <sup>rd</sup> Ca <sup>2+</sup> transient (min)               | <b>0.7</b><br>(0.7; 0.8)<br>n=56       | <b>0.8<sup>a</sup></b><br>(0.8; 1.0)<br>n=29       | <b>1.0</b><br>(0.8; 1.2)<br>n=92       | <b>0.8<sup>c</sup></b><br>(0.8; 1.0)<br>n=73       | <b>0.8</b><br>(0.7; 0.8)<br>n=36       | <b>0.7</b><br>(0.5; 0.7)<br>n=16                   |
| Amplitude of the 3 <sup>rd</sup> Ca <sup>2+</sup> transient ( $\Delta F/F_0$ ) | <b>0.7</b><br>(0.6; 0.9)<br>n=56       | <b>0.8<sup>c</sup></b><br>(0.8; 0.8)<br>n=29       | <b>0.8</b><br>(0.7; 0.8)<br>n=92       | <b>0.8</b><br>(0.7; 0.8)<br>n=73                   | <b>0.8</b><br>(0.7; 0.9)<br>n=36       | <b>0.9</b><br>(0.8; 0.9)<br>n=16                   |
| Rate of the 1 <sup>st</sup> Ca <sup>2+</sup> increase (min <sup>-1</sup> )     | <b>3.0</b><br>(2.4; 3.9)<br>n=54       | <b>3.0</b><br>(2.5; 3.8)<br>n=27                   | <b>3.2</b><br>(2.8; 3.9)<br>n=92       | <b>3.1</b><br>(2.6; 3.8)<br>n=74                   | <b>5.0</b><br>(3.7; 5.9)<br>n=36       | <b>3.7<sup>c</sup></b><br>(2.9; 4.8)<br>n=18       |
| Rate of the 1 <sup>st</sup> Ca <sup>2+</sup> decrease (min <sup>-1</sup> )     | <b>-3.9</b><br>(-4.5; -2.9)<br>n=56    | <b>-3.9</b><br>(-4.3; -3.5)<br>n=30                | <b>-3.5</b><br>(-3.8; -3.2)<br>n=92    | <b>-3.5</b><br>(-3.9; -3.0)<br>n=74                | <b>-4.5</b><br>(-4.9; -3.9)<br>n=36    | <b>-4.0<sup>c</sup></b><br>(-4.3; -3.8)<br>n=18    |
| Rate of the 3 <sup>rd</sup> Ca <sup>2+</sup> increase (min <sup>-1</sup> )     | <b>4.0</b><br>(3.1; 5.0)<br>n=56       | <b>4.5<sup>c</sup></b><br>(4.2; 4.8)<br>n=29       | <b>3.7</b><br>(3.3; 4.1)<br>n=92       | <b>3.8</b><br>(3.4; 4.2)<br>n=74                   | <b>4.8</b><br>(4.2; 5.4)<br>n=36       | <b>5.1</b><br>(4.6; 5.3)<br>n=16                   |
| Rate of the 3 <sup>rd</sup> Ca <sup>2+</sup> decrease (min <sup>-1</sup> )     | <b>-4.1</b><br>(-4.8; -3.4)<br>n=56    | <b>-4.5<sup>d</sup></b><br>(-4.7; -4.1)<br>n=29    | <b>-3.7</b><br>(-4.2; -3.5)<br>n=92    | <b>-3.7</b><br>(-4.0; -3.3)<br>n=74                | <b>-4.4</b><br>(-5.4; -4.1)<br>n=36    | <b>-4.9</b><br>(-5.3; -4.5)<br>n=16                |
| Time of pronuclei formation (min)                                              | <b>189.4</b><br>(170.4; 229.6)<br>n=26 | <b>242.7<sup>b</sup></b><br>(214.0; 261.7)<br>n=13 | <b>206.5</b><br>(179.5; 253.2)<br>n=42 | <b>247.4<sup>b</sup></b><br>(229.4; 269.3)<br>n=22 | <b>225.3</b><br>(216.5; 251.6)<br>n=28 | <b>201.5<sup>b</sup></b><br>(188.3; 211.1)<br>n=12 |

\*calculated for the first 2 hrs of Ca<sup>2+</sup> oscillations

# no. of experiments conducted for the respective group of oocytes

<sup>a</sup>p<0.001, <sup>b</sup>p<0.01, <sup>c</sup>p<0.05, <sup>d</sup>p=0.05 vs. oocytes from young females of the respective background

# Supplemental Figure S1

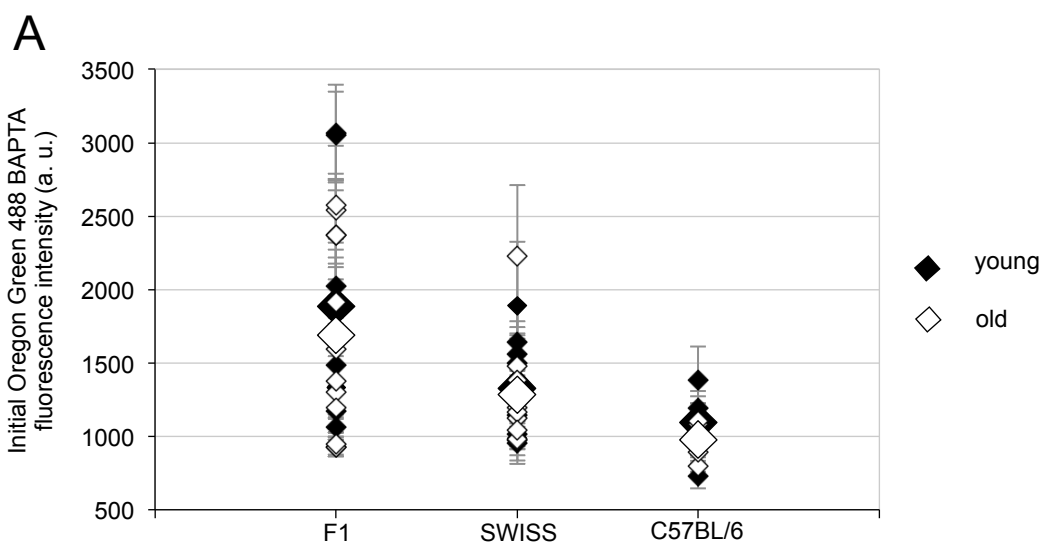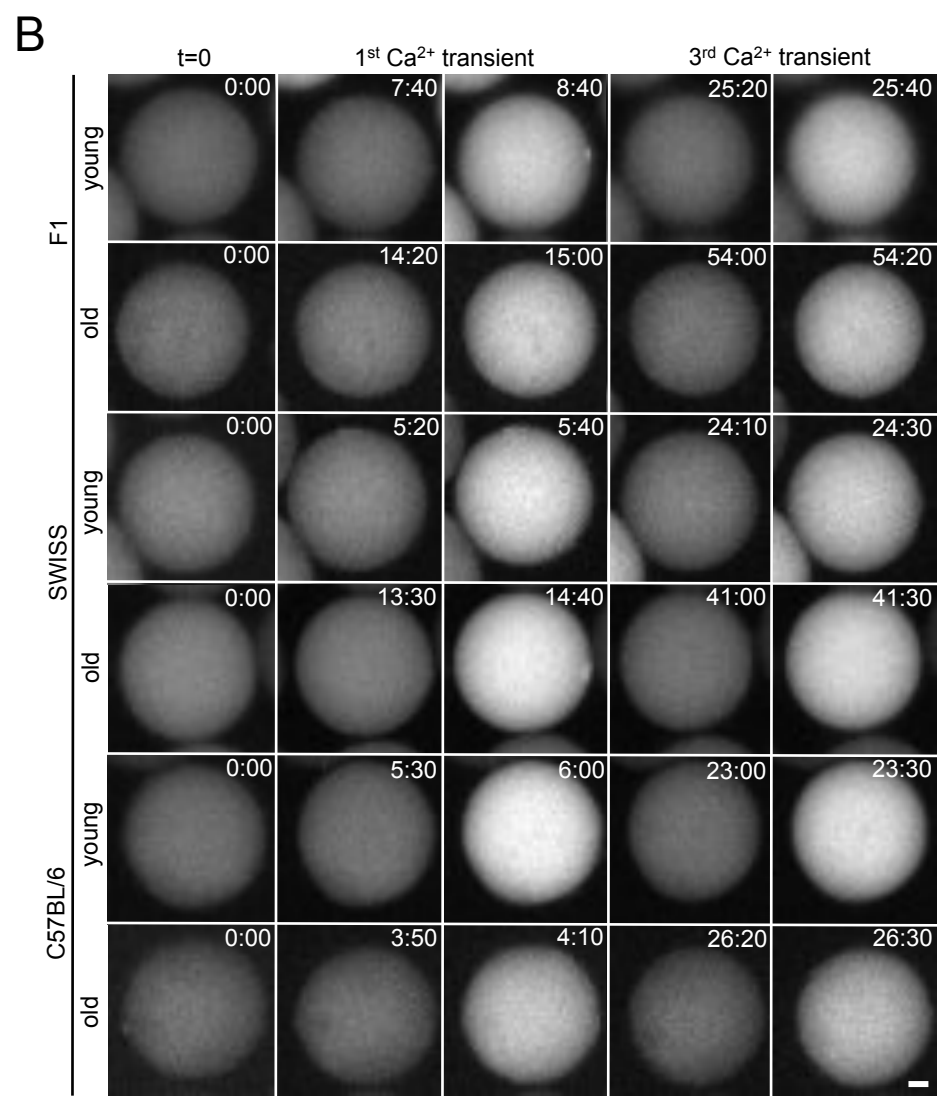

# Supplemental Figure S2

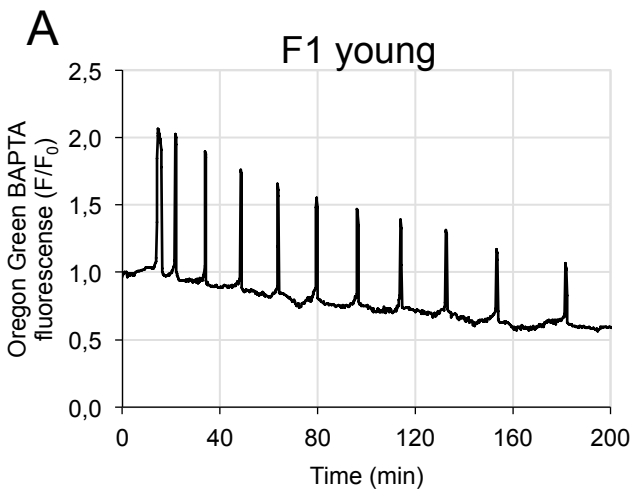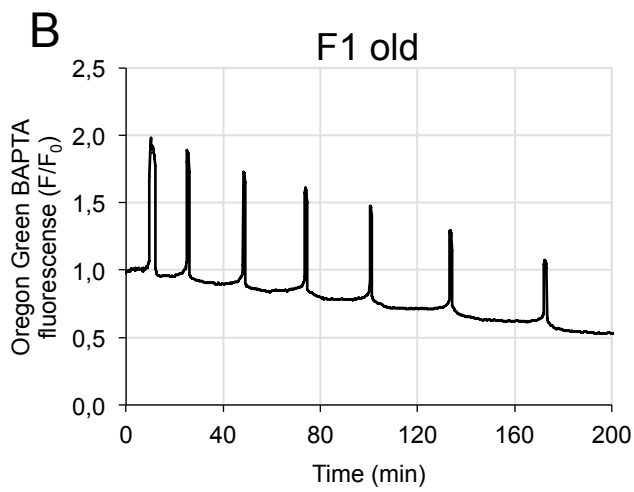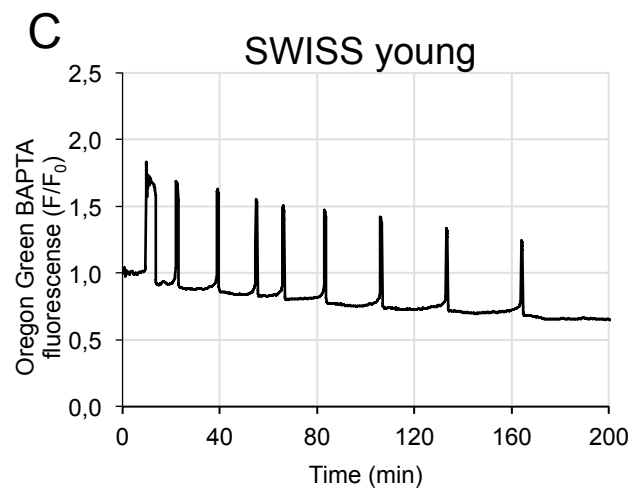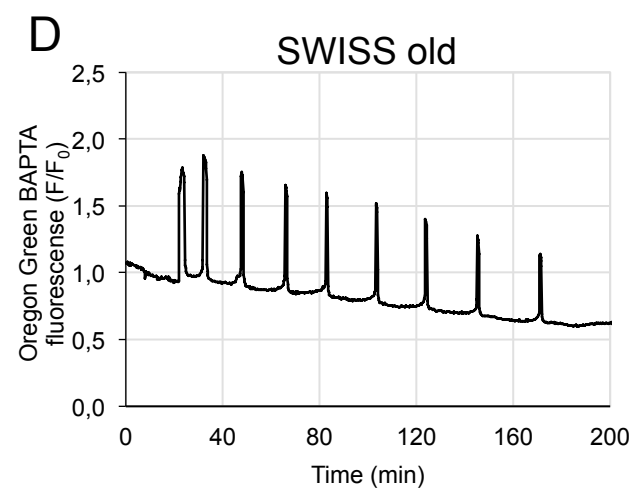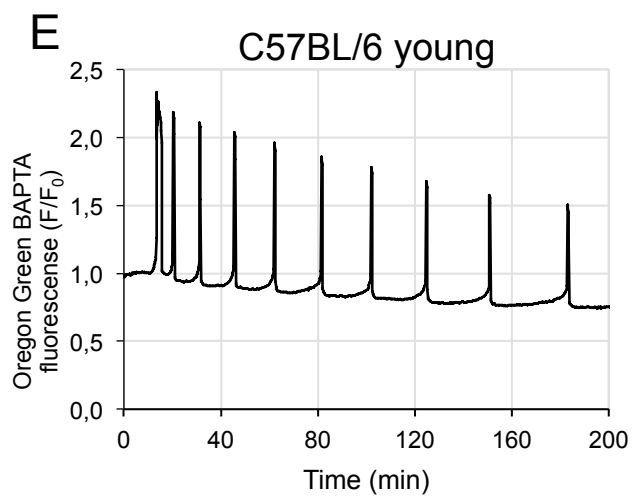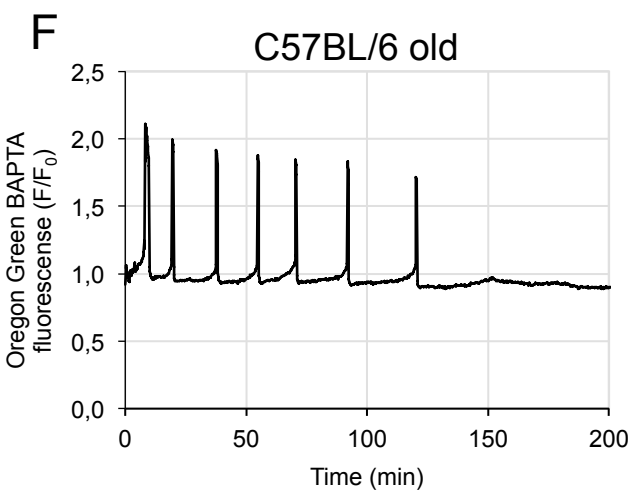

# Supplemental Figure S3

## A

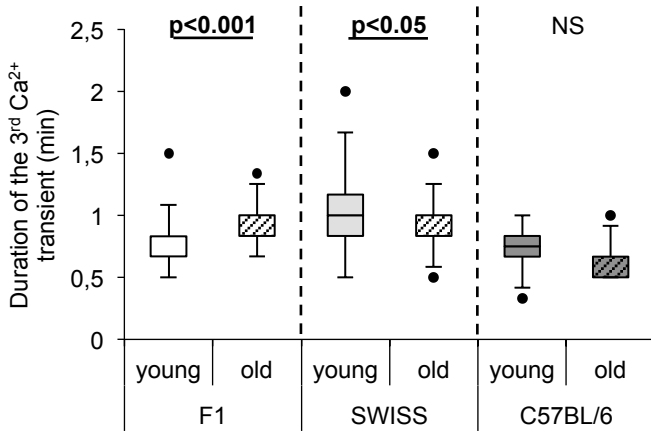

## B

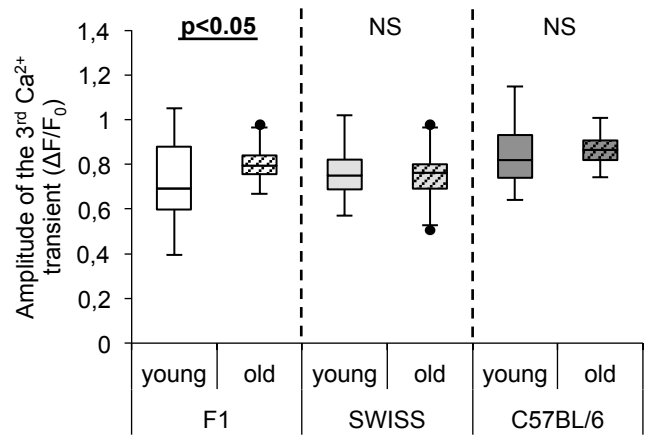

## C

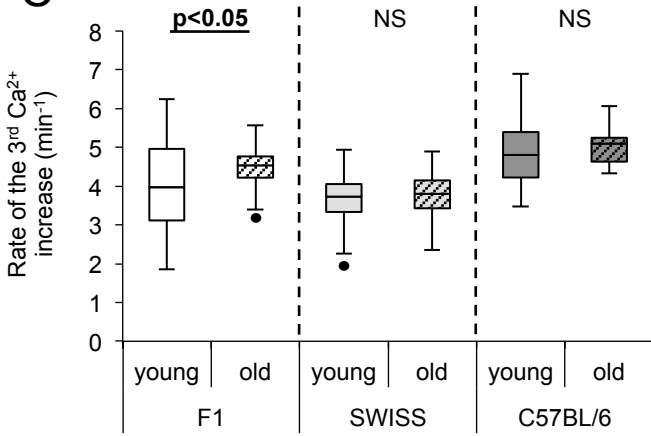

## D

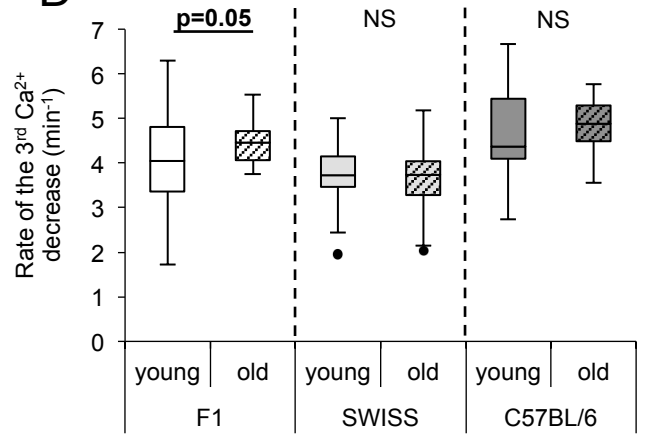

# Supplemental Figure S4

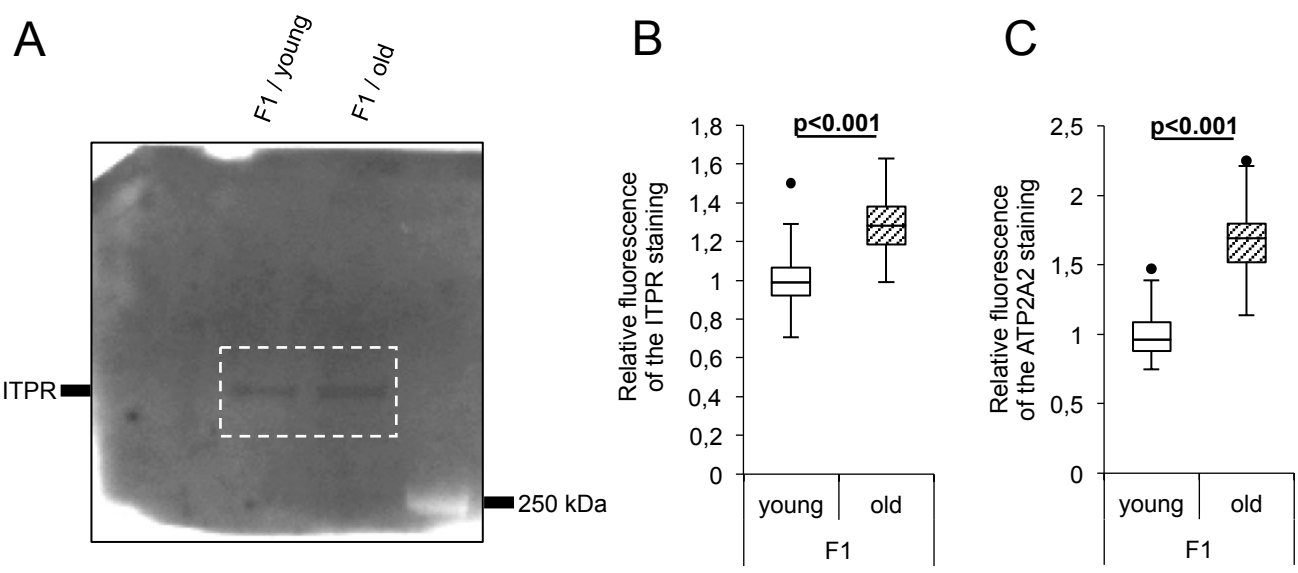

Supplement: supplementary_material_ioaa139.pdf [file supplementary_material_ioaa139.pdf]
